# Supplementary material
Source: HighWire-hosted journal article supplement (https://ard.bmj.com/content/76/2/435)
Supplement: inline-supplementary-material-2 [file inline-supplementary-material-2.pdf]

**Supplementary Table 1. TCR sequencing statistics.**

| <b>Patient ID</b> | <b>Cell type</b> | <b># reads</b> | <b># TCRb sequences</b> | <b># Unique TCRb sequences</b> | <b>In-frame rearrangements (%)</b> |
|-------------------|------------------|----------------|-------------------------|--------------------------------|------------------------------------|
| 1                 | iaTreg           | 88,857         | 1,720                   | 1,485                          | 76.8                               |
|                   | other Treg       | 874,900        | 35,695                  | 32,525                         | 79.2                               |
|                   | synovial Treg    | 174,773        | 1,855                   | 1,517                          | 76.0                               |
| 2                 | iaTreg           | 227,300        | 2,885                   | 2,293                          | 77.7                               |
|                   | other Treg       | 855,283        | 20,445                  | 16,969                         | 79.3                               |
|                   | synovial Treg    | 337,811        | 3,382                   | 1,510                          | 74.4                               |
| 3                 | iaTreg           | 140,893        | 1,721                   | 1,532                          | 77.7                               |
|                   | other Treg       | 1,079,811      | 27,610                  | 25,259                         | 80.4                               |
|                   | synovial Treg    | 225,407        | 4,373                   | 2,593                          | 79.3                               |
| 4                 | iaTreg           | 367,307        | 2,866                   | 2,061                          | 72.6                               |
|                   | other Treg       | 1,293,168      | 47,610                  | 41,482                         | 79.3                               |
|                   | synovial Treg    | 675,044        | 5,840                   | 4,126                          | 73.7                               |
| 5                 | iaTreg           | 1,299,181      | 28,380                  | 25,294                         | 80.7                               |
|                   | other Treg       | 1,346,506      | 78,455                  | 69,677                         | 79.0                               |
|                   | synovial Treg    | 981,697        | 8,685                   | 2,789                          | 70.8                               |
| 6                 | iaTreg           | 67,075         | 2,149                   | 1,676                          | 74.0                               |
|                   | other Treg       | 1,146,279      | 62,618                  | 57,340                         | 80.3                               |
|                   | synovial Treg    | 323,531        | 8,456                   | 4,253                          | 75.1                               |
| 7                 | iaTreg           | 44,680         | 982                     | 802                            | 73.6                               |
|                   | other Treg       | 788,966        | 15,698                  | 12,858                         | 79.2                               |
|                   | synovial Treg    | 546,441        | 13,110                  | 3,564                          | 77.7                               |
| 8                 | iaTreg           | 76,064         | 2,188                   | 1,704                          | 79.3                               |
|                   | other Treg       | 574,179        | 10,860                  | 10,274                         | 83.6                               |
|                   | synovial Treg    | 630,479        | 14,147                  | 4,530                          | 81.1                               |
| 9                 | iaTreg           | 45,926         | 1,291                   | 991                            | 71.4                               |
|                   | other Treg       | 603,784        | 20,384                  | 15,918                         | 79.4                               |
|                   | synovial Treg    | 355,230        | 10,650                  | 4,964                          | 76.7                               |
| 10                | iaTreg           | 56,126         | 930                     | 840                            | 72.7                               |
|                   | other Treg       | 946,801        | 21,672                  | 20,085                         | 77.8                               |
|                   | synovial Treg    | 387,119        | 8,014                   | 3,700                          | 75.0                               |
| 11                | iaTreg           | 58,911         | 1,533                   | 1,169                          | 74.2                               |
|                   | other Treg       | 984,143        | 29,782                  | 22,295                         | 79.8                               |
|                   | synovial Treg    | 415,301        | 11,796                  | 4,820                          | 78.7                               |
